# Supplementary material
Source: HighWire-hosted journal article supplement (https://www.cmajopen.ca/highwire/filestream/80964/field_highwire_adjunct_files/0/2016-0072_original_submission.pdf)
Supplement: 2016-0072_original_submission.pdf [file 2016-0072_original_submission.pdf]

**Title:** Traumatic brain injury and incarceration in men and women: a population-based cohort study

**Authors:** Kathryn E McIsaac, PhD<sup>a,b</sup>; Andrea Moser, PhD<sup>c</sup>; Rahim Moineddin, PhD<sup>d,e</sup>; Leslie Anne Keown, PhD<sup>c</sup>; Geoff Wilton, MA<sup>c</sup>; Lynn A Stewart, PhD<sup>c</sup>; Angela Colantonio, PhD<sup>f,g</sup>; Avery B Nathens, MD, PhD<sup>e,h</sup>; Flora I Matheson, PhD<sup>b,e</sup>

**Affiliations:**

<sup>a</sup> Dalla Lana School of Public Health, University of Toronto, Toronto, Ontario, Canada

<sup>b</sup> Centre for Urban Health Solutions, St. Michael's Hospital, Toronto, Ontario, Canada

<sup>c</sup> Correctional Service Canada, Ottawa, Ontario, Canada

<sup>d</sup> Department of Family and Community Medicine, University of Toronto, Toronto, Ontario, Canada

<sup>e</sup> Institute for Clinical Evaluative Sciences, Sunnybrook Hospital, Toronto, Ontario, Canada

<sup>f</sup> Rehabilitation Sciences Institute, Toronto, Ontario, Canada

<sup>g</sup> Department of Occupational Science and Occupational Therapy, University of Toronto, Toronto, Canada

<sup>h</sup> Department of Surgery, Sunnybrook Health Sciences Centre & University of Toronto, Toronto, Ontario, Canada

**Corresponding Author:**

Flora Matheson

Centre for Urban Health Solutions, St Michael's Hospital.

30 Bond Street. Toronto, ON. M5B1W8.

1-416-864-6060 ext. 77482

mathesonf@smh.ca

**Contributor's statement:** AM, RM, LAK, LAS, AC, ABN and FIM conceived the study and were integral with the acquisition of data. KEM, RM, FIM analyzed the data. KEM, RM, LAK, GW, LAS, FIM were involved in the interpretation of data. KEM wrote the first draft of the manuscript and received critical input from all co-authors. All authors approved the final version of this manuscript and agree to act as guarantors of the work.

**Conflict of interest:** AM, LAK, GW, LAS are employees of the Correctional Service of Canada.

**Funding:** This work was supported by the Social Sciences and Humanities Research Council [#890-2011-0027] and the Canadian Institutes of Health Research (#96566 to KEM and #CGW-126-580 to AC).

1  
2  
3 **Title:** Traumatic brain injury and incarceration in men and women: a population-based cohort  
4 study  
5

6  
7 **ABSTRACT:**  
8

9  
10 Background: There is recent evidence to suggest that sustaining a traumatic brain injury (TBI)  
11 increases risk of criminal justice system involvement, including incarceration. The objective of  
12 this study was to explore the association between traumatic brain injury (TBI) and incarceration  
13 risk in men and women.  
14

15  
16 Methods: We identified a cohort of 1.418 million young adults (aged 18-28) on July 1, 1997,  
17 living in Ontario, Canada, from administrative health records; they were followed to December  
18 31, 2011. TBI history was obtained from emergency and hospital records and incarceration  
19 history was obtained from Canadian federal correctional records. We estimated the hazard of  
20 incarceration using Cox Proportional Hazard Models, adjusting for relevant sociodemographic  
21 characteristics and medical history.  
22

23  
24 Results: There were 3531 incarcerations over 18 297 599 person-years of follow-up. The  
25 incidence of incarceration was higher in persons with prior TBI compared to those without a  
26 prior TBI. In fully adjusted models, men and women who had sustained a TBI were  
27 approximately 2.5 times more likely to be incarcerated than men and women who had not  
28 sustained a TBI, respectively.  
29

30  
31 Interpretation: TBI was associated with an increased risk of incarceration in men and women in  
32 Ontario. Our research highlights the importance of designing primary, secondary and tertiary  
33 prevention strategies to mitigate risk of TBI and incarceration in the population.  
34

35  
36 Key words: Traumatic brain injury; prison; gender  
37

38  
39 Abstract word count: 215  
40  
41  
42  
43  
44  
45  
46  
47  
48  
49  
50  
51  
52  
53  
54  
55  
56  
57  
58  
59  
60

Manuscript word count: 2498

Confidential

1  
2  
3  
4  
5  
6  
7  
8  
9  
10  
11  
12  
13  
14  
15  
16  
17  
18  
19  
20  
21  
22  
23  
24  
25  
26  
27  
28  
29  
30  
31  
32  
33  
34  
35  
36  
37  
38  
39  
40  
41  
42  
43  
44  
45  
46  
47  
48  
49  
50  
51  
52  
53  
54  
55  
56  
57  
58  
59  
60

## 1 Introduction

2  
3 Traumatic brain injury (TBI) is an important public health concern: the estimated global lifetime  
4 prevalence is 3.49%(1-4). In Ontario, Canada, there were 1.7 new cases of TBI per 1000 people  
5 in 2010/11, an increase of over 20% since 2004/05(5). TBI may result in long-term disability and  
6 is a major cause of death and disability (6, 7). The impacts of TBI are broad and diverse and may  
7 include behavioural changes and cognitive impairment(7, 8).

8  
9 Potential behavioural consequences of TBI, like aggression and impulsivity, could increase  
10 propensity for criminal justice involvement(9-12). Meta-analyses indicate that the lifetime  
11 prevalence of TBI is high in persons in correctional facilities and may be substantially higher  
12 than the general population(13-15). This finding has also been reported in Canada(16, 17). Four  
13 longitudinal studies have examined the association between TBI and criminal justice  
14 involvement focusing on criminality and violent crime(18-21). All suggest an association  
15 between TBI and criminal justice involvement although results were not always statistically  
16 significant(18-21). There has been no research examining the association between traumatic  
17 brain injury and risk of incarceration for serious or chronic offences and none in Canada.

18  
19 Our study builds on the literature regarding TBI and criminal justice involvement with a  
20 particular focus on serious and chronic offending. In Canada, the federal justice system  
21 supervises persons sentenced by the courts to two years or more. Such sentences would be  
22 characteristic for persons committing a serious offence or who are chronically in contact with the  
23 criminal justice system(22). Our overall objective was to determine if prior TBI was associated  
24 with an increased risk of incarceration in men and women.

1  
2  
3 254  
5  
6 **Methods**7  
8 *Setting and design*

9  
10 We conducted a cohort study of young adults aged 18-28 in Ontario, Canada, between July 1,  
11 1997 and March 31, 2011 using linked administrative data. This study was approved by the  
12 29 institutional review board at Sunnybrook Health Sciences Centre, Toronto, Canada and received  
13 30 additional approvals at St. Michael's Hospital and the University of Toronto.  
14 31

15  
16  
17  
18  
19  
20 *Participants*

21  
22 Individuals aged 18 to 28 years on July 1, 1997 (i.e. the index date) were included if they were  
23 33 eligible for health care in Ontario between January 1, 1993 and July 1, 1997.i.e.,listed in the  
24 34 Registered Persons Database, a population-based registry for health care(23). This age group was  
25 35 selected because of their high risk of TBI and criminal justice involvement(5, 24, 25).  
26 36  
27 37 Participants remained in the cohort until they were federally incarcerated, died, or lost health  
28 38 care eligibility. Ontario's administrative health data do not consistently capture those who  
29 39 emigrate from the province and would be ineligible for health care: we assumed men without  
30 40 health care utilization in the 5 years prior and women without health care utilization in the 3  
31 41 years prior were no longer in the province and their date of ineligibility was date of last contact  
32 42 plus 3 or 5 years. Longer time since last contact was allowed for young men as they are less  
33 43 likely to seek health care(26, 27).  
34 44  
35 45  
36 46  
37 47  
38 48  
39 49  
40 50  
41 51  
42 52  
43 53  
44 54  
45 55  
46 56  
47 57  
48 58  
49 59  
50 60

51 *Data sources and linkage*

52  
53 This study linked administrative health datasets to correctional records. Health datasets included  
54 46 the Registered Persons Database, the Ontario Health Insurance Plan database, the Canadian  
55 47

1  
2  
3 48 Institutes for Health Information Discharge Abstracts Database, and the National Ambulatory  
4  
5 49 Care Reporting System. The correctional dataset was the Offender Management System, a  
6  
7  
8 50 computerized record system that tracks information from admission until sentence completion,  
9  
10  
11 51 maintained by the Correctional Service Canada, the government agency responsible for  
12  
13 52 supervising persons with federal sentences(28). All persons who enter a federal correctional  
14  
15 53 facility will be recorded in the Offender Management System, and these data have 100%  
16  
17 54 population coverage. Datasets were linked using unique encoded identifiers and analyzed at the  
18  
19  
20 55 Institute for Clinical Evaluative Sciences and this linkage is described elsewhere(29).  
21  
22  
23 56

24  
25 57 *Variable definitions*

26  
27 58 The outcome was federal incarceration defined as admission date to a federal facility, obtained  
28  
29 59 from the Offender Management System. The accuracy of admission date has not been  
30  
31  
32 60 systematically studied in the OMS. We retained the first federal sentence occurring between  
33  
34 61 January 1, 1998 and March 31, 2011. We excluded persons with suspended records(i.e.,  
35  
36 62 pardoned).  
37  
38  
39 63

40  
41 64 The exposure of interest was TBI. Persons with a recorded diagnosis of TBI in the Discharge  
42  
43 65 Abstracts Database or the National Ambulatory Care Reporting System between July 1, 1997  
44  
45  
46 66 and September 30, 2010 were classified as sustaining a TBI. The Discharge Abstracts Database  
47  
48 67 contained hospital discharges and the National Ambulatory Care Reporting System contained  
49  
50  
51 68 emergency room visits. Although these are national databases, we only had access to Ontario  
52  
53 69 data. TBI was based on ICD-9 and ICD-10 diagnoses codes: ICD-9 codes in the range of 800-  
54  
55  
56  
57  
58  
59  
60

1  
2  
3 70 801, 803-804, 850-854.1 or 959.01(30) or ICD-10 codes in the range of S02.0, S02.1, S02.3,  
4  
5 71 S02.7, S02.8, S02.9, S06, S07.1, T90.2, T90.5 were considered TBI related visits(30, 31).  
6  
7  
8 72

9  
10 73 TBI since index was treated as a binary time-varying covariate. We lagged the exposure variable  
11  
12 74 by six-months to account for time between committing the related crime and entering the prison  
13  
14 75 system. In 2008, this median time was approximately 3 months(32); by lagging the exposure  
15  
16 76 variable to six months, we reduce the possibility that TBI was sustained after the crime was  
17  
18 77 committed for the majority of the cohort.  
19  
20  
21 78

22  
23  
24 79 Individual-level covariates were age, sex, rurality, prior history of TBI, and history of a mental  
25  
26 80 health diagnosis at baseline. Covariates were selected *a priori* based on their associations with  
27  
28 81 TBI and/or incarceration(5, 25, 33-39) and their availability in administrative data. Age, sex and  
29  
30 82 rurality (residential postal code) were extracted from the Registered Persons Database. History of  
31  
32 83 TBI between January 1, 1993 and July 1, 1997 was obtained from the Discharge Abstracts  
33  
34 84 Database or the Ontario Health Insurance Plan database, the latter containing all physician  
35  
36 85 billings. We did not ascertain lifetime history of TBI because of data quality concerns in  
37  
38 86 Ontario's administrative data before 1993. We considered four types of mental health diagnoses:  
39  
40 87 psychotic disorders (ICD-9: 295-298)(40); non-psychotic disorders (ICD-9: 300-302; 306; 309;  
41  
42 88 311)(40); substance abuse disorders (ICD-9: 291-292; 303-304)(40, 41); or social problems  
43  
44 89 (ICD-9: 897-902; 904-906; 909)(40). If an individual had at least one of these diagnostic codes  
45  
46 90 in the applicable databases between January 1, 1995 and June 30, 1997 they were considered  
47  
48 91 positive for that mental health diagnoses.  
49  
50  
51  
52  
53  
54  
55 92  
56  
57  
58  
59  
60

1  
2  
3 93 We used three neighbourhood-level measures of marginalization used widely in Ontario: ethnic  
4  
5 94 concentration, material deprivation, and residential instability (42-44).  
6  
7

8 95

9  
10 96 *Statistical Analyses*  
11

12 97 We performed descriptive analyses, by TBI, over follow-up. We also calculated the crude  
13  
14 98 incidence of federal incarceration for men and women.  
15  
16

17 99

18  
19  
20 100 To examine the association between TBI and federal incarceration, we used an extended Cox  
21  
22 101 proportional hazards model with time-varying covariates(45). Data were organized as a counting  
23  
24 102 process structure with a July 1, 1997 origin(46). Individuals stopped contributing to the Cox  
25  
26 103 model on their date of first federal incarceration; death; loss of health care eligibility; or March  
27  
28 104 31, 2011. Because persons were censored at the time of first federal incarceration and we lagged  
29  
30 105 the exposure variable by six months, we reduce the possibility of protopathic bias.  
31  
32

33 106

34  
35  
36 107 We report crude and multivariable adjusted Hazard Ratios (HR) and 95% confidence intervals  
37  
38 108 (95% CI) for men and women. Multivariable models were adjusted for age, neighbourhood  
39  
40 109 marginalization, prior history of TBI, and mental health diagnosis history. We also ran a pooled  
41  
42 110 model to test for an interaction by sex. The proportionality assumption was not violated(45).  
43  
44

45 111

46  
47  
48 112 We handled missing data in two ways: 1) complete case analyses; 2) modeling missing as a  
49  
50 113 separate category. The results were similar and we report the findings from the complete case  
51  
52 114 analyses. Because the proportion of missing data was so small (<5%), it is unlikely that  
53  
54 115 missingness biased our statistical inference(47-49).  
55  
56  
57  
58  
59  
60



1  
2  
3 116  
4  
5  
6 117 *Sensitivity analysis*  
7  
8 118 We performed seven sensitivity analyses. 1) Excluding individuals reporting TBI between 1993  
9  
10 119 and 1997 in efforts to obtain an “incident” cohort; 2) Excluding individuals whose correctional  
11  
12 120 records were linked to health records probabilistically(29); 3) Lagging the TBI exposure variable  
13  
14 121 by one year; 4) Not lagging the TBI exposure variable; 5) Broadening the definition of TBI to  
15  
16 122 include primary care visits; 6) Estimating risk of incarceration for persons discharged from the  
17  
18 123 emergency room for TBI and those who were hospitalized for TBI; 7) Treating TBI as a 3-level  
19  
20 124 exposure variable:0 TBI, 1 TBI or 2 or more TBI.  
21  
22  
23  
24  
25  
26

## 27 126 **Results**

28  
29 127 The cohort included 748,393 men and 731,013 women. Table 1 presents baseline characteristics  
30  
31 128 of respondents by TBI over follow-up. There were 77,519 persons (5.2%) who sustained at least  
32  
33 129 one TBI. After excluding those with missing data, 716,585 men and 701,480 women remained.  
34  
35 130 Together, they contributed 18,297,599 person-years of follow-up (mean=12.7 years; median  
36  
37 131 =13.7 years).  
38  
39  
40  
41  
42

43 133 Table 2 presents the rate of federal incarceration for men overall and by characteristics of  
44  
45 134 interest, as well as unadjusted and adjusted HRs. There were 3321 men federally incarcerated  
46  
47 135 over follow-up, yielding an incidence rate of 35.9 per 100,000 person-years (95% CI:34.7-37.2).  
48  
49 136 The incidence of incarceration was higher in men who had sustained a TBI (102.6 per 100,000  
50  
51 137 person-years, 95% CI:91.9-113.2) compared with men who had not sustained a TBI (3.5 per  
52  
53 138 100,000 person-years, 95% CI:32.1-34.5). In unadjusted models, men who had sustained a TBI  
54  
55  
56  
57  
58  
59  
60

1  
2  
3 139 had a three-times greater hazard of incarceration than men who had not sustained a TBI. The  
4  
5 140 association attenuated in fully adjusted models (HR=2.47; 95% CI:2.21-2.77).  
6  
7

8 141  
9  
10 142 Table 3 presents data for women. There were 210 women federally incarcerated over 9,058,616  
11  
12 143 person years of follow-up, yielding an incidence rate of 2.3 per 100,000 person-years (95% CI:  
13  
14 144 2.0-2.6). In crude models, TBI increased the hazard of incarceration approximately four fold. In  
15  
16 145 fully adjusted models, the hazard of incarceration was 2.76 times higher in women with, as  
17  
18 146 opposed to without, a TBI (95% CI:1.65-4.60).  
19  
20

21 147  
22  
23 148 We did not find evidence of an interaction between TBI, sex and risk of incarceration (p=0.73).  
24  
25  
26

27 149  
28  
29 150 Table 4 presents estimates from our sensitivity analyses. In men, TBI was a risk factor for  
30  
31 151 incarceration irrespective of the exposure or cohort definition. In women, the magnitude of  
32  
33 152 association between TBI and risk of incarceration was strong but not statistically significant in  
34  
35 153 three analyses. We also found a suggestion of a dose-response relationship between number of  
36  
37 154 TBIs and risk of incarceration in men.  
38  
39

40 155  
41  
42  
43 156 **Interpretation:**  
44  
45 157 We conducted a population-based cohort study to explore the association between TBI and risk  
46  
47 158 of incarceration for serious and chronic offending. Our findings indicate that sustaining a TBI  
48  
49 159 was associated with an increased risk of incarceration for such offences. The relative association  
50  
51 160 was similar in men and women and was upheld in a variety of sensitivity analyses, although  
52  
53 161 estimates were less precise and not always significant in women.  
54  
55  
56  
57  
58  
59  
60

1  
2  
3 162  
4  
5  
6 163 These findings contribute to emerging research suggesting TBI is an important risk factor for  
7  
8 164 criminal justice involvement(18-20) and builds on this evidence: it is the largest of its kind with  
9  
10 165 16% more criminal justice events than reported previously(19). Further, this is the only study to  
11  
12 166 explore how TBI is associated with serious and chronic offending with a focus exclusively on  
13  
14  
15 167 persons sentenced to federal custody(28). A more novel contribution of our research is the sex-  
16  
17 168 based analyses. Only one study has examined how TBI affects incarceration risk in men and  
18  
19  
20 169 women separately(19). Although the confidence limits for women were wide, reflecting the  
21  
22 170 small number of women who were incarcerated in our study, they are consistent with prior  
23  
24 171 research: the relative increase in incarceration risk was similar in men and women who sustained  
25  
26  
27 172 a TBI(10). Finally, although prior research suggests multiple head injuries are *common* in  
28  
29 173 correctional populations, we are one of the first to explore if there is a dose-response relationship  
30  
31  
32 174 with TBI and *risk* of incarceration(50).

33  
34 175  
35  
36 176 We report effect sizes consistent with Sweden(18) and almost twice as large as those in  
37  
38 177 Australia(20), Finland(21), and New Zealand(19). Such inconsistencies may arise from different  
39  
40  
41 178 outcome definitions. Studies reporting smaller effect sizes used a more general outcome of  
42  
43 179 criminality(19-21) whereas the Swedish study, with a similar effect size, studied only violent  
44  
45  
46 180 crime(18). It may be that the types of crimes committed, or the length of sentences received,  
47  
48 181 differ in persons with and without a prior TBI, and that these differences drive the stronger  
49  
50  
51 182 associations. Differences could also be related to other aspects of the research methodology. As  
52  
53 183 an example, we are the first to explicitly model TBI as a time-varying exposure allowing us to  
54  
55 184 capture TBI at the time of incarceration, as opposed to assuming TBI was stable over follow-up.  
56  
57  
58  
59  
60

1  
2  
3 185 If TBI is positively associated with criminal justice involvement, as it appears to be, such  
4  
5 186 misclassification would have biased effect estimates in previous studies towards the null. Finally,  
6  
7  
8 187 studies were conducted in countries with diverse criminal justice and health-care systems;  
9  
10 188 differences in effect sizes could be related to broader societal factors. Most importantly, taken  
11  
12 189 together, the body of research supports the hypothesis that TBI is associated with an increased  
13  
14 190 risk of criminal justice involvement(18-21).

### 17 191 **Limitations**

19 192 TBI was measured using diagnosis codes from emergency room and hospital visits and we may  
20  
21  
22 193 have missed persons with mild TBI who were not treated in these settings: a New Zealand study  
23  
24 194 suggested that 95% of all TBIs are mild(24). In a sensitivity analysis, we relaxed the definition of  
25  
26 195 TBI to include physician visits and the association remained. We intended to explore severity of  
27  
28 196 TBI by assigning ICD diagnoses-based severity scores but were unable to assign scores to 35%  
29  
30 197 of the TBI-population because these ICD codes were head injury, unspecified. However, our  
31  
32 198 sensitivity analyses found that men and women admitted to hospital with a TBI were more likely  
33  
34 199 to experience incarceration than men and women who were discharged from the ER with a TBI,  
35  
36 200 suggesting the risk of incarceration could be greater for those with more severe TBI. We also  
37  
38 201 acknowledge potential measurement error in our control variables which could introduce residual  
39  
40 202 confounding (e.g., mental health was captured using diagnosis codes and not all individuals with  
41  
42 203 mental illness seek medical attention)(51). We did not have information on severity of  
43  
44 204 impulsivity and substance use in the administrative data, both of which have been associated  
45  
46 205 with TBI and criminal justice involvement(33, 52). Although failing to account for this could  
47  
48 206 have biased effect estimates, we do not expect residual confounding to be the driving explanation  
49  
50 207 behind our findings given the magnitude of association observed. Thinking about  
51  
52  
53  
54  
55  
56  
57  
58  
59  
60

1  
2  
3 208 generalizability, this study examined the association between TBI and chronic and serious  
4  
5 209 offending. Although our findings are consistent other research, we cannot say with certainty the  
6  
7  
8 210 association would hold for more general criminal justice involvement. We did not have  
9  
10 211 information on admissions to provincial facilities. We fully recognize that the pathway to  
11  
12 212 incarceration and criminal justice involvement is complex. Relationships may be bidirectional:  
13  
14 213 e.g., impulsive behaviour and substance abuse can be a cause or consequence of TBI(18, 19) and  
15  
16  
17 214 not all persons with a TBI will go on to experience incarceration. More research is needed to  
18  
19 215 deconstruct how TBI could play a role in these pathways and if different mechanisms of injury  
20  
21 216 (e.g. motor vehicle collisions vs. falls) affect incarceration risk differently.  
22  
23  
24 217

## 26 218 **Conclusions**

27  
28  
29 219 We found that TBI was associated with an increased risk of incarceration for serious and chronic  
30  
31 220 offending in both men and women. Our findings are based on a large, population-based cohort of  
32  
33 221 young adults who were followed for an average of approximately 13 years and are consistent  
34  
35 222 with research reported elsewhere. Future research should focus on primary, secondary, and  
36  
37 223 tertiary prevention which may help to reduce incarceration or improve the outcomes of persons  
38  
39 224 with TBI who are incarcerated.  
40  
41  
42  
43 225  
44  
45 226  
46  
47

48 227 **Acknowledgements:** We gratefully acknowledge Kinwah Fung and Alejandro Gonzalez from the  
49 228 Institute for Clinical Evaluative Sciences for their methodological support and expertise.  
50 229

51 230 This study was supported by the Centre for Urban Health Solutions, St. Michael's Hospital. This study  
52 231 was supported by the Institute for Clinical Evaluative Sciences (ICES), which is funded by an annual  
53 232 grant from the Ontario Ministry of Health and Long-Term Care (MOHLTC). The opinions, results and  
54 233 conclusions reported in this paper are those of the authors and are independent from the funding sources.  
55 234 No endorsement by ICES or the Ontario MOHLTC is intended or should be inferred.  
56 235  
57  
58  
59  
60

1  
2  
3  
4  
5  
6  
7  
8  
9  
10  
11  
12  
13  
14  
15  
16  
17  
18  
19  
20  
21  
22  
23  
24  
25  
26  
27  
28  
29  
30  
31  
32  
33  
34  
35  
36  
37  
38  
39  
40  
41  
42  
43  
44  
45  
46  
47  
48  
49  
50  
51  
52  
53  
54  
55  
56  
57  
58  
59  
60

236 Parts of this material are based on data and information compiled and provided by CIHI. However, the  
237 analyses, conclusions, opinions and statements expressed herein are those of the author, and not  
238 necessarily those of CIHI.

Confidential

## References:

1. Langlois JA, Rutland-Brown W, Wald MM. The epidemiology and impact of traumatic brain injury: a brief overview. *The Journal of head trauma rehabilitation* 2006;21(5):375-378.
2. The Lancet N. Traumatic brain injury: time to end the silence. *The Lancet Neurology* 2010;9(4):331.
3. Bryan-Hancock C, Harrison J. The global burden of traumatic brain injury: preliminary results from the Global Burden of Disease Project. *Injury Prevention* 2010;16(Suppl 1):A17-A17.
4. Neurological Health Charities Canada, Public Health Agency of Canada, Health Canada, Research TCIOH. Mapping connections: an understanding of neurological conditions in Canada. In. Ottawa: Public Health Agency of Canada; 2014.
5. Ng R, Maxwell C, Yates E, Nylén K, Antflick J, Jette N, et al. Brain disorders in Ontario: prevalence, incidence and costs from health administrative data. Toronto, ON: Institute for Clinical Evaluative Sciences; 2015.
6. Hyder AA, Wunderlich CA, Puvanachandra P, Gururaj G, Kobusingye OC. The impact of traumatic brain injuries: a global perspective. *NeuroRehabilitation* 2007;22(5):341-53.
7. Carroll LJ, Cassidy JD, Cancelliere C, Côté P, Hincapié CA, Kristman VL, et al. Systematic Review of the Prognosis After Mild Traumatic Brain Injury in Adults: Cognitive, Psychiatric, and Mortality Outcomes: Results of the International Collaboration on Mild Traumatic Brain Injury Prognosis. *Archives of Physical Medicine and Rehabilitation* 2014;95(3):S152-S173.
8. Stéfan A, Mathé J-F. What are the disruptive symptoms of behavioral disorders after traumatic brain injury? A systematic review leading to recommendations for good practices. *Annals of Physical and Rehabilitation Medicine* 2015.
9. Kaba F, Diamond P, Haque A, MacDonald R, Venters H. Traumatic Brain Injury Among Newly Admitted Adolescents in the New York City Jail System. *Journal of Adolescent Health* 2014;54(5):615-617.
10. Schofield PW, Butler TG, Hollis SJ, Smith NE, Lee SJ, Kelso WM. Traumatic brain injury among Australian prisoners: rates, recurrence and sequelae. *Brain Injury* 2006;20(5):499-506.
11. Slaughter B, Fann JR, Ehde D. Traumatic brain injury in a county jail population: prevalence, neuropsychological functioning and psychiatric disorders. *Brain Injury* 2003;17(9):731-741.
12. Williams WH, Mewse AJ, Tonks J, Mills S, Burgess CN, Cordan G. Traumatic brain injury in a prison population: prevalence and risk for re-offending. *Brain Injury* 2010;24(10):1184-1188.
13. Farrer TJ, Frost RB, Hedges DW. Prevalence of traumatic brain injury in juvenile offenders: a meta-analysis. *Child neuropsychology* 2013;19(3):225-234.
14. Farrer TJ, Hedges DW. Prevalence of traumatic brain injury in incarcerated groups compared to the general population: A meta-analysis. *Progress in Neuro-Psychopharmacology and Biological Psychiatry* 2011;35(2):390-394.
15. Shiroma EJ, Ferguson PL, Pickelsimer EE. Prevalence of traumatic brain injury in an offender population: A meta-analysis. *Journal of Correctional Health Care* 2010;16(2):147-159.

16. Colantonio A, Kim H, Allen S, Asbridge M, Petgrave J, Brochu S. Traumatic brain injury and early life experiences among men and women in a prison population. *Journal of Correctional Health Care* 2014;20(4):271-279.
17. Stewart LA, Nolan A, Sapers J, Power J, Panaro L, Smith J. Chronic health conditions reported by male inmates newly admitted to Canadian federal penitentiaries. *CMAJ open* 2015;3(1):E97.
18. Fazel S, Lichtenstein P, Grann M, Långström N. Risk of violent crime in individuals with epilepsy and traumatic brain injury: a 35-year Swedish population study. *PLoS Med* 2011;8(12):e1001150.
19. Schofield PW, Malacova E, Preen DB, D'Este C, Tate R, Reekie J, et al. Does traumatic brain injury lead to criminality? A whole-population retrospective cohort study using linked data. *PLoS one* 2015;10(7):e0132558.
20. McKinlay A, Corrigan J, Horwood L, Fergusson D. Substance abuse and criminal activities following traumatic brain injury in childhood, adolescence, and early adulthood. *The Journal of head trauma rehabilitation* 2014;29(6):498-506.
21. Timonen M, Miettunen J, Hakko H, Zitting P, Veijola J, von Wendt L, et al. The association of preceding traumatic brain injury with mental disorders, alcoholism and criminality: the Northern Finland 1966 Birth Cohort Study. *Psychiatry research* 2002;113(3):217-226.
22. Reitano J. Adult correctional statistics in Canada, 2014/2015. In: Canada S, editor. *Juristat: Statistics Canada*; 2016.
23. Iron K, Zagorski B, Sykora K, Manuel DG. Living and dying in Ontario: an opportunity for improved health information. Toronto: Institute for Clinical Evaluative Sciences; 2008.
24. Feigin VL, Theadom A, Barker-Collo S, Starkey NJ, McPherson K, Kahan M, et al. Incidence of traumatic brain injury in New Zealand: a population-based study. *Lancet Neurol* 2013;12(1):53-64.
25. Centers for Disease Control and Prevention. Rates of TBI-related Emergency Department Visits by Age Group - United States, 2001-2010. In; 2014.
26. Mustard CA, Kaufert P, Kozyrskyj A, Mayer T. Sex Differences in the Use of Health Care Services. *New England Journal of Medicine* 1998;338(23):1678-1683.
27. Bertakis KD, Azari R, Helms LJ, Callahan EJ, Robbins JA. Gender differences in the utilization of health care services. *Journal of Family Practice* 2000;49(2):147-152.
28. Correctional Services Program. Adult correctional statistics in Canada, 2013/2014. In: *Juristat*; 2015.
29. McIsaac KE, Farrell MacDonald S, Chong N, Moser A, Moineddin R, Colantonio A, et al. Creating a Powerful Platform to Explore Health in a Correctional Population: A Record Linkage Study. *PLoS ONE* 2016;11(8):e0161173.
30. Marr AL, Coronado VG. Central nervous system injury surveillance data submission standards—2002. Atlanta, GA: Centers for Disease Control and Prevention, National Center for Injury Prevention and Control 2004.
31. Chen AY, Colantonio A. Defining neurotrauma in administrative data using the International Classification of Diseases Tenth Revision. *Emerg Themes Epidemiol* 2011;8:4.
32. Porter L, Calverley D. Trends in the use of remand in Canada. In: Canada S, editor. *Juristat: Minister of Industry*; 2011.
33. Fazel S, Bains P, Doll H. Substance abuse and dependence in prisoners: a systematic review. *Addiction* 2006;101(2):181-191.



- 1
  - 2
  - 3
  - 4
  - 5
  - 6
  - 7
  - 8
  - 9
  - 10
  - 11
  - 12
  - 13
  - 14
  - 15
  - 16
  - 17
  - 18
  - 19
  - 20
  - 21
  - 22
  - 23
  - 24
  - 25
  - 26
  - 27
  - 28
  - 29
  - 30
  - 31
  - 32
  - 33
  - 34
  - 35
  - 36
  - 37
  - 38
  - 39
  - 40
  - 41
  - 42
  - 43
  - 44
  - 45
  - 46
  - 47
  - 48
  - 49
  - 50
  - 51
  - 52
  - 53
  - 54
  - 55
  - 56
  - 57
  - 58
  - 59
  - 60
34. Fazel S, Danesh J. Serious mental disorder in 23 000 prisoners: a systematic review of 62 surveys. *The Lancet* 2002;359(9306):545-550.
35. Leff M, Stallones L, Keefe TJ, Rosenblatt R, Reeds M. Comparison of urban and rural non-fatal injury: the results of a statewide survey. *Injury Prevention* 2003;9(4):332-337.
36. Gabella B, Hoffman RE, Marine WW, Stallones L. Urban and rural traumatic brain injuries in Colorado. *Annals of Epidemiology* 1997;7(3):207-212.
37. Barnfield TV, Leathem JM. Incidence and outcomes of traumatic brain injury and substance abuse in a New Zealand prison population. *Brain Injury* 1998;12(6):455-466.
38. Baillargeon J, Binswanger IA, Penn JV, Williams BA, Murray OJ. Psychiatric disorders and repeat incarcerations: the revolving prison door. *American Journal of Psychiatry* 2009;166(1):103-109.
39. Fazel S, Baillargeon J. The health of prisoners. *The Lancet* 2011;377(9769):956-965.
40. Steele LS, Glazier RH, Lin E, Evans M. Using administrative data to measure ambulatory mental health service provision in primary care. *Med Care* 2004;42(10):960-5.
41. Quan H, Sundararajan V, Halfon P, Fong A, Burnand B, Luthi J-C, et al. Coding algorithms for defining comorbidities in ICD-9-CM and ICD-10 administrative data. *Medical care* 2005;1130-1139.
42. Matheson FI, Dunn JR, Smith KL, Moineddin R, Glazier RH. Development of the Canadian marginalization index: A new tool for the study of inequality. *Can J Public Health* 2012;103(8):eS12-eS16.
43. Matheson FI, Moineddin R, Dunn JR, Creatore MI, Gozdyra P, Glazier RH. Urban neighborhoods, chronic stress, gender and depression. *Soc Sci Med* 2006;63(10):2604-16.
44. Durbin A, Moineddin R, Lin E, Steele LS, Glazier RH. Examining the relationship between neighbourhood deprivation and mental health service use of immigrants in Ontario, Canada: a cross-sectional study. *BMJ Open* 2015;5(3).
45. Allison P. *Survival analysis using SAS: a practical guide*: SAS Publishing; 1995.
46. Therneau TM, Grambsch PM. *Modeling survival data: extending the Cox model*: Springer Science & Business Media; 2000.
47. Allison PD. *Missing data: Quantitative applications in the social sciences*. *British Journal of Mathematical and Statistical Psychology* 2002;55(1):193-196.
48. Allison PD. *Missing data series: Quantitative applications in the social sciences*. Thousand Oaks. CA: Sage 2002.
49. Schafer JL. Multiple imputation: a primer. *Stat Methods Med Res* 1999;8(1):3-15.
50. Williams WH, Cordan G, Mewse AJ, Tonks J, Burgess CN. Self-reported traumatic brain injury in male young offenders: a risk factor for re-offending, poor mental health and violence? *Neuropsychol Rehabil* 2010;20(6):801-12.
51. Matheson FI, Smith KL, Fazli GS, Moineddin R, Dunn JR, Glazier RH. Physical health and gender as risk factors for usage of services for mental illness. *Journal of epidemiology and community health* 2014;68(10):971-978.
52. Higgins GE, Kirchner EE, Ricketts ML, Marcum CD. Impulsivity and offending from childhood to young adulthood in the United States: A developmental trajectory analysis. *International Journal of Criminal Justice Sciences* 2013;8(2):182.

**Table 1.** Sociodemographic characteristics and medical history of study cohort at study baseline, by traumatic brain injury status, Ontario, Canada (1997-2011) (N=1 479 406)

| Characteristics                              | At least 1 TBI <sup>a</sup><br>(N=77 519)<br>n, % | No TBI<br>(N=1 401 887)<br>n, % |
|----------------------------------------------|---------------------------------------------------|---------------------------------|
| Incarcerated Over follow-up                  |                                                   |                                 |
| No                                           | 77,117 (99.5)                                     | 1,398,556 (99.8)                |
| Yes                                          | 402 (0.5)                                         | 3,331 (0.2)                     |
| Age (mean, sd)                               | 22.8 (3.2)                                        | 23.1 (3.2)                      |
| 18-21 years                                  | 32,235 (41.6)                                     | 489,801 (34.9)                  |
| 22-24 years                                  | 19,779 (25.5)                                     | 372,714 (26.6)                  |
| 25-28 years                                  | 25,505 (32.9)                                     | 539,372 (38.5)                  |
| Sex                                          |                                                   |                                 |
| Female                                       | 28,410 (36.6)                                     | 702,603 (50.1)                  |
| Male                                         | 49,109 (63.4)                                     | 699,284 (49.9)                  |
| Rural residence                              |                                                   |                                 |
| No                                           | 65,596 (84.6)                                     | 1,207,066 (86.1)                |
| Yes                                          | 11,657 (15.0)                                     | 171,652 (12.2)                  |
| Missing                                      | 266 (0.3)                                         | 23,169 (1.7)                    |
| Material deprivation <sup>b</sup>            |                                                   |                                 |
| Q1 (least deprived)                          | 15,248 (19.7)                                     | 328,137 (23.4)                  |
| Q2                                           | 16,063 (20.7)                                     | 307,752 (22.0)                  |
| Q3                                           | 15,825 (20.4)                                     | 277,083 (19.8)                  |
| Q4                                           | 14,342 (18.5)                                     | 235,336 (16.8)                  |
| Q5 (most deprived)                           | 13,057 (16.8)                                     | 195,222 (13.9)                  |
| Missing                                      | 2,984 (3.8)                                       | 58,357 (4.2)                    |
| Ethnic concentration <sup>b</sup>            |                                                   |                                 |
| Q1 (least concentrated)                      | 11,669 (15.1)                                     | 188,437 (13.4)                  |
| Q2                                           | 15,008 (19.4)                                     | 251,657 (18.0)                  |
| Q3                                           | 13,577 (17.5)                                     | 239,193 (17.1)                  |
| Q4                                           | 14,968 (19.3)                                     | 279,384 (19.9)                  |
| Q5 (most concentrated)                       | 19,313 (24.9)                                     | 384,859 (27.5)                  |
| Missing                                      | 2,984 (3.8)                                       | 58,357 (4.2)                    |
| Residential Instability <sup>b</sup>         |                                                   |                                 |
| Q1 (least unstable)                          | 15,491 (20.0)                                     | 312,087 (22.3)                  |
| Q2                                           | 15,296 (19.7)                                     | 285,173 (20.3)                  |
| Q3                                           | 14,741 (19.0)                                     | 255,428 (18.2)                  |
| Q4                                           | 17,437 (22.5)                                     | 288,167 (20.6)                  |
| Q5 (most unstable)                           | 11,570 (14.9)                                     | 202,675 (14.5)                  |
| Missing                                      | 2,984 (3.8)                                       | 58,357 (4.2)                    |
| Previous TBI <sup>c,d</sup>                  |                                                   |                                 |
| No                                           | 68,639 (88.5)                                     | 1,326,647 (94.6)                |
| Yes                                          | 8,880 (11.5)                                      | 75,240 (5.4)                    |
| Psychotic Mood Disorder <sup>c,e,f</sup>     |                                                   |                                 |
| No                                           | 76,368 (98.5)                                     | 1,390,308 (99.2)                |
| Yes                                          | 1,151 (1.5)                                       | 11,579 (0.8)                    |
| Non-psychotic Mood Disorder <sup>c,e,g</sup> |                                                   |                                 |
| No                                           | 57,909 (74.7)                                     | 1,119,044 (79.8)                |
| Yes                                          | 19,610 (25.3)                                     | 282,843 (20.2)                  |
| Substance use disorder <sup>c,e,h</sup>      |                                                   |                                 |
| No                                           | 74,869 (96.6)                                     | 1,381,839 (98.6)                |
| Yes                                          | 2,650 (3.4)                                       | 20,048 (1.4)                    |
| Social Problems <sup>c,e,i</sup>             |                                                   |                                 |
| No                                           | 74,721 (96.4)                                     | 1,365,949 (97.4)                |
| Yes                                          | 2,798 (3.6)                                       | 35,938 (2.6)                    |

Q1: quintile 1; TBI: Traumatic brain injury

<sup>a</sup> At least 1 TBI between April 1 1997- December 2011<sup>b</sup> As per the Ontario Marginalization Index, by quintile<sup>c</sup> Medical records from physician visits, including primary care providers<sup>d</sup> History of TBI between April 1, 1993- June 30, 1997<sup>e</sup> History of diagnosis between January 1, 1995-June 30, 1997<sup>f</sup> Defined as hospital visit for ICD-9 diagnostic codes in the range of 295-298<sup>g</sup> Defined as hospital visit for ICD-9 diagnostic codes in the range of 300-302; 306; 309; 3011<sup>h</sup> Defined as hospital visit for ICD-9 diagnostic codes in the range of 291-292; 303-304

<sup>1</sup> Defined as hospital visit for ICD-9 diagnostic codes in the range 897-906; 909

Confidential

1  
2  
3  
4  
5  
6  
7  
8  
9  
10  
11  
12  
13  
14  
15  
16  
17  
18  
19  
20  
21  
22  
23  
24  
25  
26  
27  
28  
29  
30  
31  
32  
33  
34  
35  
36  
37  
38  
39  
40  
41  
42  
43  
44  
45  
46  
47  
48  
49  
50  
51  
52  
53  
54  
55  
56  
57  
58  
59  
60

1  
2  
3  
4  
5  
6  
7  
8  
9  
10  
11  
12  
13  
14  
15  
16  
17  
18  
19  
20  
21  
22  
23  
24  
25  
26  
27  
28  
29  
30  
31  
32  
33  
34  
35  
36  
37  
38  
39  
40  
41  
42  
43  
44  
45  
46  
47  
48  
49

**Table 2. Incidence Rate (IR), Unadjusted and Adjusted Hazard Ratio (HR) for incarceration in Men, by Traumatic Brain Injury, Sociodemographic Characteristics, and Medical History, Ontario, Canada, 1997-2011 (N= 716 585)**

| Characteristics                              | Number of incarcerations | Person-years     | Incidence rate (per 100,000 person-years) |                  | Unadjusted Model |                   | Adjusted Model |                   |
|----------------------------------------------|--------------------------|------------------|-------------------------------------------|------------------|------------------|-------------------|----------------|-------------------|
|                                              |                          |                  | IR                                        | 95% CI           | HR               | 95% CI            | HR             | 95% CI            |
| <b>Overall</b>                               | <b>3321</b>              | <b>9 238 892</b> | <b>35.9</b>                               | <b>34.7,37.2</b> |                  |                   |                |                   |
| TBI <sup>a</sup>                             |                          |                  |                                           |                  |                  |                   |                |                   |
| No                                           | 2965                     | 8 891 856        | 33.5                                      | 32.1,34.5        | <b>1.00</b>      | <b>1.00</b>       | <b>1.00</b>    | <b>1.00</b>       |
| Yes                                          | 356                      | 347 126          | 102.6                                     | 91.9,113.2       | <b>3.26</b>      | <b>2.91,3.64</b>  | <b>2.47</b>    | <b>2.21,2.77</b>  |
| Age                                          |                          |                  |                                           |                  |                  |                   |                |                   |
| 18-21 years                                  | 1297                     | 3 262 825        | 39.8                                      | 37.6, 42.0       | <b>1.00</b>      | 1.00              | 1.00           | 1.00              |
| 22-24 years                                  | 873                      | 2 449 332        | 35.6                                      | 33.3, 38.1       | <b>0.90</b>      | <b>0.82, 0.98</b> | <b>0.87</b>    | <b>0.80, 0.95</b> |
| 25-28 years                                  | 1151                     | 3 526 825        | 32.6                                      | 30.8, 34.6       | <b>0.82</b>      | <b>0.76, 0.89</b> | <b>0.77</b>    | <b>0.71, 0.83</b> |
| Rural residence                              |                          |                  |                                           |                  |                  |                   |                |                   |
| No                                           | 2966                     | 8 115 993        | 36.5                                      | 35.2, 37.9       | 1.00             | 1.00              | 1.00           | 1.00              |
| Yes                                          | 355                      | 1 123 388        | 31.6                                      | 28.1, 35.1       | <b>0.87</b>      | <b>0.77, 0.97</b> | 1.03           | 0.91, 1.17        |
| Material deprivation <sup>b</sup>            |                          |                  |                                           |                  |                  |                   |                |                   |
| Q1 (least deprived)                          | 439                      | 2 204 177        | 19.9                                      | 18.1, 21.9       | 1.00             | 1.00              | 1.00           | 1.00              |
| Q2                                           | 569                      | 2 129 505        | 26.7                                      | 24.6, 29.0       | <b>1.34</b>      | <b>1.19, 1.52</b> | <b>1.29</b>    | <b>1.14, 1.47</b> |
| Q3                                           | 639                      | 1 933 271        | 33.0                                      | 30.6, 35.7       | <b>1.66</b>      | <b>1.47, 1.88</b> | <b>1.48</b>    | <b>1.30, 1.68</b> |
| Q4                                           | 704                      | 1 627 296        | 43.3                                      | 40.2, 46.6       | <b>2.17</b>      | <b>1.93,2.45</b>  | <b>1.76</b>    | <b>1.55, 2.00</b> |
| Q5 (most deprived)                           | 970                      | 1 344 731        | 72.1                                      | 67.7, 76.8       | <b>3.62</b>      | <b>3.24,4.06</b>  | <b>2.54</b>    | <b>2.23, 2.89</b> |
| Ethnic concentration <sup>b</sup>            |                          |                  |                                           |                  |                  |                   |                |                   |
| Q1 (least concentrated)                      | 416                      | 1 344 374        | 29.8                                      | 27.1, 32.8       | 1.00             | 1.00              | 1.00           | 1.00              |
| Q2                                           | 563                      | 1 773 547        | 30.5                                      | 28.1, 33.2       | 1.03             | 0.90,1.16         | 1.03           | 0.91, 1.17        |
| Q3                                           | 531                      | 1 656 420        | 30.8                                      | 28.3, 33.6       | 1.04             | 0.91,1.18         | 1.00           | 0.87, 1.14        |
| Q4                                           | 662                      | 1 883 787        | 33.8                                      | 33.1, 36.5       | <b>1.14</b>      | <b>1.00, 1.28</b> | 1.04           | 0.91, 1.18        |
| Q5 (most concentrated)                       | 1149                     | 2 580 852        | 42.8                                      | 40.4, 45.3       | <b>1.44</b>      | <b>1.29, 1.61</b> | 1.06           | 0.94, 1.20        |
| Residential Instability <sup>b</sup>         |                          |                  |                                           |                  |                  |                   |                |                   |
| Q1 (least unstable)                          | 485                      | 2 189 635        | 22.3                                      | 20.2, 24.2       | 1.00             | 1.00              | 1.00           | 1.00              |
| Q2                                           | 492                      | 2 012 090        | 24.4                                      | 22.4, 26.7       | 1.10             | 0.97, 1.25        | 1.01           | 0.89, 1.15        |
| Q3                                           | 611                      | 1 783 041        | 34.3                                      | 31.6, 37.1       | <b>1.55</b>      | <b>1.37, 1.75</b> | <b>1.20</b>    | <b>1.06, 1.37</b> |
| Q4                                           | 919                      | 1 952 207        | 47.1                                      | 44.1,50.2        | <b>2.12</b>      | <b>1.90, 2.37</b> | <b>1.38</b>    | <b>1.22, 1.56</b> |
| Q5 (most unstable)                           | 814                      | 1 301 008        | 62.5                                      | 58.4,67.0        | <b>2.82</b>      | <b>2.52, 3.16</b> | <b>1.74</b>    | <b>1.53, 1.97</b> |
| Previous TBI <sup>c,d</sup>                  |                          |                  |                                           |                  |                  |                   |                |                   |
| No                                           | 2801                     | 8 570 118        | 32.7                                      | 31.5, 33.9       | 1.00             | 1.00              | 1.00           | 1.00              |
| Yes                                          | 520                      | 668 864          | 77.7                                      | 71.3, 84.7       | <b>2.38</b>      | <b>2.17, 2.61</b> | <b>1.88</b>    | <b>1.71, 2.07</b> |
| Psychotic Mood Disorder <sup>c,e,f</sup>     |                          |                  |                                           |                  |                  |                   |                |                   |
| No                                           | 3233                     | 9 159 856        | 35.3                                      | 34.1, 36.5       | 1.00             | 1.00              | 1.00           | 1.00              |
| Yes                                          | 88                       | 79 126           | 111.2                                     | 90.2, 137.1      | <b>3.15</b>      | <b>2.55, 3.89</b> | 1.02           | 0.82, 1.27        |
| Non-psychotic Mood Disorder <sup>c,e,g</sup> |                          |                  |                                           |                  |                  |                   |                |                   |
| No                                           | 2255                     | 7 957 300        | 28.3                                      | 27.2,29.5        | 1.00             | 1.00              | 1.00           | 1.00              |
| Yes                                          | 1066                     | 1 281 682        | 83.2                                      | 78.3, 88.3       | <b>2.93</b>      | <b>2.72, 3.16</b> | <b>2.25</b>    | <b>2.09, 2.44</b> |
| Substance use disorder <sup>c,e,h</sup>      |                          |                  |                                           |                  |                  |                   |                |                   |
| No                                           | 2988                     | 9 081 002        | 32.9                                      | 31.7, 34.1       | 1.00             | 1.00              | 1.00           | 1.00              |

|                                  |      |           |       |             |             |                   |             |                   |
|----------------------------------|------|-----------|-------|-------------|-------------|-------------------|-------------|-------------------|
| Yes                              | 333  | 157 980   | 210.8 | 189.3,234.7 | <b>6.40</b> | <b>5.72, 7.17</b> | <b>3.67</b> | <b>3.25, 4.13</b> |
| Social Problems <sup>c,e,i</sup> |      |           |       |             |             |                   |             |                   |
| No                               | 3169 | 9 099 282 | 34.8  | 33.6, 36.1  | 1.00        | 1.00              | 1.00        | 1.00              |
| Yes                              | 152  | 139 700   | 108.9 | 92.8, 127.6 | <b>3.12</b> | <b>2.66, 3.68</b> | <b>1.71</b> | <b>1.45, 2.02</b> |

CI: Confidence interval; HR: Hazard Ratio; IR: Incidence Rate; Q1: quintile 1; TBI: traumatic brain injury

<sup>a</sup> At least 1 TBI between June 30, 1997 and March 31, 2011

<sup>b</sup> As per the Ontario Marginalization Index, by quintile

<sup>c</sup> Based on medical records from physician visits, including primary care providers

<sup>d</sup> History of TBI between April 1, 1993- June 30, 1997

<sup>e</sup> History of diagnosis between January 1, 1995-June 30, 1997

<sup>f</sup> Defined as hospital visit for ICD-9 diagnostic codes in the range of 295-298

<sup>g</sup> Defined as hospital visit for ICD-9 diagnostic codes in the range of 300-302; 306; 309; 301

<sup>h</sup> Defined as hospital visit for ICD-9 diagnostic codes in the range of 291-292; 303-304

<sup>i</sup> Defined as hospital visit for ICD-9 diagnostic codes in the range 897-906; 909

Confidential

1  
2  
3  
4  
5  
6  
7  
8  
9  
10  
11  
12  
13  
14  
15  
16  
17  
18  
19  
20  
21  
22  
23  
24  
25  
26  
27  
28  
29  
30  
31  
32  
33  
34  
35  
36  
37  
38  
39  
40  
41  
42  
43  
44  
45  
46  
47  
48  
49

**Table 3. Incidence Rate (IR), Unadjusted and Adjusted Hazard Ratio (HR)for incarceration in Women, by Traumatic Brain Injury, Sociodemographic Characteristics, and Medical History, Ontario, Canada, 1997-2011 (N=701 480)**

| Characteristics                              | Number of incarcerations | Person-years     | Incidence rate (per 100,000 person-years) |                 | Unadjusted Model |                    | Adjusted Model |                   |
|----------------------------------------------|--------------------------|------------------|-------------------------------------------|-----------------|------------------|--------------------|----------------|-------------------|
|                                              |                          |                  | IR                                        | 95% CI          | HR               | 95% CI             | HR             | 95% CI            |
| <b>Overall</b>                               | <b>210</b>               | <b>9 058 616</b> | <b>2.3</b>                                | <b>2.0, 2.6</b> |                  |                    |                |                   |
| TBI <sup>a</sup>                             |                          |                  |                                           |                 |                  |                    |                |                   |
| No                                           | 193                      | 8 875 705        | 2.2                                       | 1.9, 2.5        | 1.00             | 1.00               | 1.00           | 1.00              |
| Yes                                          | 17                       | 182 912          | 9.3                                       | 4.9, 13.7       | <b>4.15</b>      | <b>2.15 -6.86</b>  | <b>2.76</b>    | <b>1.65, 4.60</b> |
| Age                                          |                          |                  |                                           |                 |                  |                    |                |                   |
| 18-21 years                                  | 77                       | 3 141 869        | 2.4                                       | 2.0, 3.1        | 1.00             | 1.00               | 1.00           | 1.00              |
| 22-24 years                                  | 47                       | 2 369 277        | 1.9                                       | 1.5, 2.6        | 0.81             | 0.56, 1.16         | 0.77           | 0.54, 1.11        |
| 25-28 years                                  | 86                       | 3 547 472        | 2.4                                       | 2.0, 3.0        | 0.99             | 0.73, 1.34         | 0.90           | 0.66, 1.23        |
| Rural residence                              |                          |                  |                                           |                 |                  |                    |                |                   |
| No                                           | 190                      | 8 151 021        | 2.3                                       | 2.0, 2.7        | 1.00             | 1.00               | 1.00           | 1.00              |
| Yes                                          | 23                       | 1 139 914        | 2.0                                       | 1.3, 3.0        | 0.82             | 0.52, 1.30         | 1.37           | 0.81, 2.31        |
| Material deprivation <sup>b</sup>            |                          |                  |                                           |                 |                  |                    |                |                   |
| Q1 (least deprived)                          | 29                       | 2 181 375        | 1.3                                       | 0.9, 1.9        | 1.00             | 1.00               | 1.00           | 1.00              |
| Q2                                           | 26                       | 2 048 689        | 1.3                                       | 0.9, 1.9        | 0.95             | 0.56, 1.62         | 0.92           | 0.54, 1.56        |
| Q3                                           | 47                       | 1 861 048        | 2.5                                       | 1.9, 3.4        | <b>1.90</b>      | <b>1.19, 3.02</b>  | 1.61           | 0.99, 2.61        |
| Q4                                           | 41                       | 1 614 514        | 2.5                                       | 1.9, 3.7        | <b>1.91</b>      | <b>1.19, 3.07</b>  | 1.37           | 0.82, 2.30        |
| Q5 (most deprived)                           | 67                       | 1 352 988        | 5.0                                       | 3.9, 6.3        | <b>3.72</b>      | <b>2.41, 5.75</b>  | <b>2.17</b>    | <b>1.31, 3.57</b> |
| Ethnic concentration <sup>b</sup>            |                          |                  |                                           |                 |                  |                    |                |                   |
| Q1 (least concentrated)                      | 13                       | 1 242 374        | 1.0                                       | 0.6, 1.8        | 1.00             | 1.00               | 1.00           | 1.00              |
| Q2                                           | 32                       | 1 669 734        | 1.9                                       | 1.3, 2.7        | 1.83             | 0.96, 3.49         | 1.89           | 0.99, 3.61        |
| Q3                                           | 32                       | 1 598 383        | 2.0                                       | 1.4, 2.8        | 1.91             | 1.00, 3.65         | 1.98           | <b>1.02, 3.83</b> |
| Q4                                           | 45                       | 1 915 808        | 2.3                                       | 1.8, 3.1        | <b>2.24</b>      | <b>1.21, 4.16</b>  | 2.24           | <b>1.17, 4.30</b> |
| Q5 (most concentrated)                       | 88                       | 2 632 316        | 3.3                                       | 2.7, 4.1        | <b>3.20</b>      | <b>1.78, 5.72</b>  | 2.71           | <b>1.44, 5.09</b> |
| Residential Instability <sup>b</sup>         |                          |                  |                                           |                 |                  |                    |                |                   |
| Q1 (least unstable)                          | 28                       | 2 051 860        | 1.4                                       | 0.9, 2.0        | 1.00             | 1.00               | 1.00           | 1.00              |
| Q2                                           | 24                       | 1 881 424        | 1.3                                       | 0.8, 1.9        | 0.93             | 0.54, 1.61         | 0.91           | 0.52, 1.58        |
| Q3                                           | 39                       | 1 718 755        | 2.3                                       | 1.6, 3.1        | <b>1.66</b>      | <b>1.02, 2.70</b>  | <b>1.34</b>    | 0.80, 2.25        |
| Q4                                           | 56                       | 1 992 259        | 2.8                                       | 2.2, 3.6        | <b>2.06</b>      | <b>1.31, 3.24</b>  | <b>1.30</b>    | 0.79, 2.16        |
| Q5 (most unstable)                           | 63                       | 1 414 316        | 4.4                                       | 3.5, 5.7        | <b>3.27</b>      | <b>2.09, 5.10</b>  | <b>1.88</b>    | <b>1.14, 3.09</b> |
| Previous TBI <sup>c,d</sup>                  |                          |                  |                                           |                 |                  |                    |                |                   |
| No                                           | 185                      | 8 690 013        | 2.1                                       | 1.8, 2.4        | 1.00             | 1.00               | 1.00           | 1.00              |
| Yes                                          | 25                       | 368 602          | 6.8                                       | 4.6, 10.0       | <b>3.18</b>      | <b>2.10, 4.84</b>  | <b>2.25</b>    | <b>1.47, 3.45</b> |
| Psychotic Mood Disorder <sup>c,e,f</sup>     |                          |                  |                                           |                 |                  |                    |                |                   |
| No                                           | 198                      | 8 983 104        | 2.2                                       | 1.9, 2.5        | 1.00             | 1.00               | 1.00           | 1.00              |
| Yes                                          | 12                       | 75 512           | 15.9                                      | 9.0, 28.0       | <b>7.21</b>      | <b>4.03, 12.91</b> | 2.54           | <b>1.37, 4.70</b> |
| Non-psychotic Mood Disorder <sup>c,e,g</sup> |                          |                  |                                           |                 |                  |                    |                |                   |
| No                                           | 111                      | 6 592 676        | 1.7                                       | 1.4, 2.0        | 1.00             | 1.00               | 1.00           | 1.00              |
| Yes                                          | 99                       | 2 465 939        | 4.0                                       | 3.3, 4.9        | <b>2.38</b>      | <b>1.82, 3.12</b>  | <b>1.60</b>    | <b>1.20, 2.14</b> |
| Substance use disorder <sup>c,e,h</sup>      |                          |                  |                                           |                 |                  |                    |                |                   |
| No                                           | 182                      | 9 212 901        | 2.0                                       | 1.7, 2.3        | 1.00             | 1.00               | 1.00           | 1.00              |

|                                  |     |           |      |            |              |                     |             |                    |
|----------------------------------|-----|-----------|------|------------|--------------|---------------------|-------------|--------------------|
| Yes                              | 32  | 114 994   | 27.8 | 19.7, 39.3 | <b>14.69</b> | <b>10.08, 21.40</b> | <b>8.65</b> | <b>5.78, 12.95</b> |
| Social Problems <sup>c,e,i</sup> |     |           |      |            |              |                     |             |                    |
| No                               | 186 | 8 717 397 | 2.1  | 1.8, 2.5   | 1.00         | 1.00                | 1.00        | 1.00               |
| Yes                              | 24  | 341 219   | 7.0  | 4.7, 10.5  | <b>3.30</b>  | <b>2.15, 5.04</b>   | <b>1.98</b> | <b>1.28, 3.08</b>  |

CI: Confidence interval; HR: Hazard Ratio; IR: Incidence Rate; Q1: quintile 1; TBI: traumatic brain injury

<sup>a</sup> At least 1 TBI between June 30, 1997 and March 31, 2011

<sup>b</sup> As per the Ontario Marginalization Index, by quintile

<sup>c</sup> Based on medical records from physician visits, including primary care providers

<sup>d</sup> History of TBI between April 1, 1993- June 30, 1997

<sup>e</sup> History of diagnosis between January 1, 1995-June 30, 1997

<sup>f</sup> Defined as hospital visit for ICD-9 diagnostic codes in the range of 295-298

<sup>g</sup> Defined as hospital visit for ICD-9 diagnostic codes in the range of 300-302; 306; 309; 301

<sup>h</sup> Defined as hospital visit for ICD-9 diagnostic codes in the range of 291-292; 303-304

<sup>i</sup> Defined as hospital visit for ICD-9 diagnostic codes in the range 897-906; 909

1  
2  
3  
4  
5  
6  
7  
8  
9  
10  
11  
12  
13  
14  
15  
16  
17  
18  
19  
20  
21  
22  
23  
24  
25  
26  
27  
28  
29  
30  
31  
32  
33  
34  
35  
36  
37  
38  
39  
40  
41  
42  
43  
44  
45  
46  
47  
48  
49

**Table 4.** Sensitivity Analyses: Hazard Ratio (HR) and 95% Confidence Interval (CI) of Traumatic Brain Injury and Incarceration in Men and Women, Ontario, Canada (1997-2011)

| Sensitivity analysis                                 | Male              |                     |                 |                     | Female            |                         |                   |                         |
|------------------------------------------------------|-------------------|---------------------|-----------------|---------------------|-------------------|-------------------------|-------------------|-------------------------|
|                                                      | Unadjusted models |                     | Adjusted models |                     | Unadjusted models |                         | Adjusted models   |                         |
|                                                      | HR <sup>a</sup>   | 95% CI <sup>b</sup> | HR <sup>a</sup> | 95% CI <sup>b</sup> | HR <sup>a</sup>   | 95% CI <sup>b</sup>     | HR <sup>a</sup>   | 95% CI <sup>b</sup>     |
| <b>Final Model</b>                                   | <b>3.26</b>       | <b>2.91,3.64</b>    | <b>2.47</b>     | <b>2.21,2.77</b>    | <b>4.15</b>       | <b>2.15, 6.86</b>       | <b>2.76</b>       | <b>1.65, 4.60</b>       |
| Exclude individuals with TBI prior to baseline       | 3.84              | 3.23, 4.57          | 3.08            | 2.59, 3.67          | 2.90              | 1.18, 7.13              | 2.12              | 0.86, 5.23              |
| Exclude records probabilistically linked             | 4.43              | 3.76, 5.28          | 3.14            | 2.66, 3.71          | 3.23              | 1.42, 7.38              | 2.08              | 0.91, 4.79              |
| Year-lagged TBI exposure                             | 3.70              | 3.14, 4.36          | 2.71            | 2.30, 3.20          | 2.60              | 1.06, 6.38              | 1.66              | 0.67, 4.11              |
| No lagged TBI exposure                               | 4.16              | 3.60, 4.82          | 3.06            | 2.64, 3.54          | 4.51              | 2.35, 8.62              | 2.93              | 1.52, 5.65              |
| Include TBI-related visits to primary care providers | 3.92              | 3.57, 4.30          | 3.02            | 2.75, 3.32          | 4.79              | 3.22, 7.12              | 3.78              | 2.25, 5.06              |
| Diagnosis code type                                  |                   |                     |                 |                     |                   |                         |                   |                         |
| Hospital-admission                                   | 4.89              | 3.55, 6.73          | 3.41            | 2.47, 4.71          | 10.19             | 2.53, 41.09             | 7.12              | 1.76, 28.86             |
| ER visit                                             | 3.13              | 2.78, 3.52          | 2.40            | 2.13, 2.70          | 4.15              | 2.51, 6.86              | 2.55              | 1.48,4.38               |
| TBI Counts:                                          |                   |                     |                 |                     |                   |                         |                   |                         |
| 0 TBI                                                | 1.00              | 1.00                | 1.00            | 1.00                | 1.00              | 1.00                    | 1.00              | 1.00                    |
| 1 TBI                                                | 3.67              | 3.12, 4.31          | 2.77            | 2.35, 3.26          | 4.02 <sup>a</sup> | 1.96, 8.25 <sup>a</sup> | 2.70 <sup>a</sup> | 1.30, 5.57 <sup>a</sup> |
| 2+ TBI                                               | 9.13              | 5.92, 14.05         | 4.50            | 2.92, 6.95          |                   |                         |                   |                         |

CI: Confidence Interval; HR: Hazard Ratio; TBI: Traumatic brain injury  
<sup>a</sup> Estimate not provided: no women experienced more than 1 TBI and went on to be incarcerated



**Title:** Traumatic brain injury and incarceration in men and women: a population-based cohort study

**Authors:** Kathryn E McIsaac, PhD<sup>a,b</sup>; Andrea Moser, PhD<sup>c</sup>; Rahim Moineddin, PhD<sup>d,e</sup>; Leslie Anne Keown, PhD<sup>c</sup>; Geoff Wilton, MA<sup>c</sup>; Lynn A Stewart, PhD<sup>c</sup>; Angela Colantonio, PhD<sup>f,g</sup>; Avery B Nathens, MD, PhD<sup>e,h</sup>; Flora I Matheson, PhD<sup>b,e</sup>

**Affiliations:**

<sup>a</sup> Dalla Lana School of Public Health, University of Toronto, Toronto, Ontario, Canada

<sup>b</sup> Centre for Urban Health Solutions, St. Michael's Hospital, Toronto, Ontario, Canada

<sup>c</sup> Correctional Service Canada, Ottawa, Ontario, Canada

<sup>d</sup> Department of Family and Community Medicine, University of Toronto, Toronto, Ontario, Canada

<sup>e</sup> Institute for Clinical Evaluative Sciences, Sunnybrook Hospital, Toronto, Ontario, Canada

<sup>f</sup> Rehabilitation Sciences Institute, Toronto, Ontario, Canada

<sup>g</sup> Department of Occupational Science and Occupational Therapy, University of Toronto, Toronto, Canada

<sup>h</sup> Department of Surgery, Sunnybrook Health Sciences Centre & University of Toronto, Toronto, Ontario, Canada

**Corresponding Author:**

Flora Matheson

Centre for Urban Health Solutions, St Michael's Hospital.

30 Bond Street. Toronto, ON. M5B1W8.

1-416-864-6060 ext. 77482

mathesonf@smh.ca

**Contributor's statement:** AM, RM, LAK, LAS, AC, ABN and FIM conceived the study and were integral with the acquisition of data. KEM, RM, FIM analyzed the data. KEM, RM, LAK, GW, LAS, FIM were involved in the interpretation of data. KEM wrote the first draft of the manuscript and received critical input from all co-authors. All authors approved the final version of this manuscript and agree to act as guarantors of the work.

**Conflict of interest:** AM, LAK, GW, LAS are employees of the Correctional Service of Canada.

**Funding:** This work was supported by the Social Sciences and Humanities Research Council [#890-2011-0027] and the Canadian Institutes of Health Research (#96566 to KEM and #CGW-126-580 to AC).

STROBE Statement—Checklist of items that should be included in reports of *cohort studies*

|                              | Item No | Recommendation                                                                                                                                                                                                                                            |
|------------------------------|---------|-----------------------------------------------------------------------------------------------------------------------------------------------------------------------------------------------------------------------------------------------------------|
| <b>Title and abstract</b>    | 1       | (a) Indicate the study's design with a commonly used term in the title or the abstract<br><br>Title: Traumatic brain injury and incarceration in men and women: a <b>population-based cohort study</b>                                                    |
|                              |         | (b) Provide in the abstract an informative and balanced summary of what was done and what was found<br><br><b>Yes, completed</b>                                                                                                                          |
| <b>Introduction</b>          |         |                                                                                                                                                                                                                                                           |
| Background/rationale         | 2       | Explain the scientific background and rationale for the investigation being reported<br><br><b>Page 1, Lines 11-23</b>                                                                                                                                    |
| Objectives                   | 3       | State specific objectives, including any prespecified hypotheses<br><br><b>Page 1: Lines 23-24</b>                                                                                                                                                        |
| <b>Methods</b>               |         |                                                                                                                                                                                                                                                           |
| Study design                 | 4       | Present key elements of study design early in the paper<br><br><b>Page 2, Lines 28-29</b>                                                                                                                                                                 |
| Setting                      | 5       | Describe the setting, locations, and relevant dates, including periods of recruitment, exposure, follow-up, and data collection<br><br><b>Page 2, Lines 28-43</b>                                                                                         |
| Participants                 | 6       | (a) Give the eligibility criteria, and the sources and methods of selection of participants. Describe methods of follow-up<br><br><b>Page 2-3: Lines 33-43</b><br><br>(b) For matched studies, give matching criteria and number of exposed and unexposed |
| Variables                    | 7       | Clearly define all outcomes, exposures, predictors, potential confounders, and effect modifiers. Give diagnostic criteria, if applicable<br><br><b>Page 3-4: Lines 57-93</b>                                                                              |
| Data sources/<br>measurement | 8*      | For each variable of interest, give sources of data and details of methods of assessment (measurement). Describe comparability of assessment methods if there is more than one group<br><br><b>Page 3-4: Lines 57-93</b>                                  |
| Bias                         | 9       | Describe any efforts to address potential sources of bias<br><br><b>Page 2, Lines 38-43</b><br><b>Page 3, Lines 52-54</b><br><b>Page 4: Lines 72-76</b><br><b>Page 5: Lines 103-104</b>                                                                   |
| Study size                   | 10      | Explain how the study size was arrived at                                                                                                                                                                                                                 |

1  
2  
3  
4  
5  
6  
7  
8  
9  
10  
11  
12  
13  
14  
15  
16  
17  
18  
19  
20  
21  
22  
23  
24  
25  
26  
27  
28  
29  
30  
31  
32  
33  
34  
35  
36  
37  
38  
39  
40  
41  
42  
43  
44  
45  
46  
47  
48  
49  
50  
51  
52  
53  
54  
55  
56  
57  
58  
59  
60

---

**Page 2: Lines 33-35**

|                        |    |                                                                                                                              |
|------------------------|----|------------------------------------------------------------------------------------------------------------------------------|
| Quantitative variables | 11 | Explain how quantitative variables were handled in the analyses. If applicable, describe which groupings were chosen and why |
|------------------------|----|------------------------------------------------------------------------------------------------------------------------------|

**Page 4: Line 72**

|                     |    |                                                                                                                                                                                                                                                                                                                        |
|---------------------|----|------------------------------------------------------------------------------------------------------------------------------------------------------------------------------------------------------------------------------------------------------------------------------------------------------------------------|
| Statistical methods | 12 | (a) Describe all statistical methods, including those used to control for confounding<br>(b) Describe any methods used to examine subgroups and interactions<br>(c) Explain how missing data were addressed<br>(d) If applicable, explain how loss to follow-up was addressed<br>(e) Describe any sensitivity analyses |
|---------------------|----|------------------------------------------------------------------------------------------------------------------------------------------------------------------------------------------------------------------------------------------------------------------------------------------------------------------------|

**Page 5-6: Lines 95-123**

---

**Result**

|              |     |                                                                                                                                                                                                                                                                                                 |
|--------------|-----|-------------------------------------------------------------------------------------------------------------------------------------------------------------------------------------------------------------------------------------------------------------------------------------------------|
| Participants | 13* | (a) Report numbers of individuals at each stage of study—eg numbers potentially eligible, examined for eligibility, confirmed eligible, included in the study, completing follow-up, and analysed<br>(b) Give reasons for non-participation at each stage<br>(c) Consider use of a flow diagram |
|--------------|-----|-------------------------------------------------------------------------------------------------------------------------------------------------------------------------------------------------------------------------------------------------------------------------------------------------|

**Page 6, Lines 126-130**

|                  |     |                                                                                                                                                                                                                                                                                                |
|------------------|-----|------------------------------------------------------------------------------------------------------------------------------------------------------------------------------------------------------------------------------------------------------------------------------------------------|
| Descriptive data | 14* | (a) Give characteristics of study participants (eg demographic, clinical, social) and information on exposures and potential confounders<br>(b) Indicate number of participants with missing data for each variable of interest<br>(c) Summarise follow-up time (eg, average and total amount) |
|------------------|-----|------------------------------------------------------------------------------------------------------------------------------------------------------------------------------------------------------------------------------------------------------------------------------------------------|

**Page 6, Lines 126-130**

**Table 1**

|              |     |                                                                |
|--------------|-----|----------------------------------------------------------------|
| Outcome data | 15* | Report numbers of outcome events or summary measures over time |
|--------------|-----|----------------------------------------------------------------|

**Page 6, Lines 132-134; Table 2**

**Page 7: Lines 141-143, Table 3**

|              |    |                                                                                                                                                                                                                                                                                                                                                                                                               |
|--------------|----|---------------------------------------------------------------------------------------------------------------------------------------------------------------------------------------------------------------------------------------------------------------------------------------------------------------------------------------------------------------------------------------------------------------|
| Main results | 16 | (a) Give unadjusted estimates and, if applicable, confounder-adjusted estimates and their precision (eg, 95% confidence interval). Make clear which confounders were adjusted for and why they were included<br>(b) Report category boundaries when continuous variables were categorized<br>(c) If relevant, consider translating estimates of relative risk into absolute risk for a meaningful time period |
|--------------|----|---------------------------------------------------------------------------------------------------------------------------------------------------------------------------------------------------------------------------------------------------------------------------------------------------------------------------------------------------------------------------------------------------------------|

**Page 6-7: Lines 132-145**

**Tables 2,3**

|                |    |                                                                                                |
|----------------|----|------------------------------------------------------------------------------------------------|
| Other analyses | 17 | Report other analyses done—eg analyses of subgroups and interactions, and sensitivity analyses |
|----------------|----|------------------------------------------------------------------------------------------------|

**Page 7-8, Lines 147-153**

**Table 4**

| <b>Discussion</b>               |    |                                                                                                                                                                            |
|---------------------------------|----|----------------------------------------------------------------------------------------------------------------------------------------------------------------------------|
| Key results                     | 18 | Summarise key results with reference to study objectives                                                                                                                   |
| <b>Page 7, Lines 156-160</b>    |    |                                                                                                                                                                            |
| Limitations                     | 19 | Discuss limitations of the study, taking into account sources of potential bias or imprecision. Discuss both direction and magnitude of any potential bias                 |
| <b>Page 9-10, Lines 190-215</b> |    |                                                                                                                                                                            |
| Interpretation                  | 20 | Give a cautious overall interpretation of results considering objectives, limitations, multiplicity of analyses, results from similar studies, and other relevant evidence |
| <b>Page 8-9, Lines 162-189</b>  |    |                                                                                                                                                                            |
| Generalisability                | 21 | Discuss the generalisability (external validity) of the study results                                                                                                      |
| <b>Page 9/10, Lines 206-209</b> |    |                                                                                                                                                                            |
| <b>Other information</b>        |    |                                                                                                                                                                            |
| Funding                         | 22 | Give the source of funding and the role of the funders for the present study and, if applicable, for the original study on which the present article is based              |
| <b>Cover page</b>               |    |                                                                                                                                                                            |

\*Give information separately for exposed and unexposed groups.

**Note:** An Explanation and Elaboration article discusses each checklist item and gives methodological background and published examples of transparent reporting. The STROBE checklist is best used in conjunction with this article (freely available on the Web sites of PLoS Medicine at <http://www.plosmedicine.org/>, Annals of Internal Medicine at <http://www.annals.org/>, and Epidemiology at <http://www.epidem.com/>). Information on the STROBE Initiative is available at <http://www.strobe-statement.org>.
